# Supplementary material for: Comparison of Global Gene Expression of Gastric Cardia and Noncardia Cancers from a High-Risk Population in China
Source: PLoS One. 2013 May 22;8(5):e63826. doi: 10.1371/journal.pone.0063826 (PMC3661768; doi:10.1371/journal.pone.0063826)
Supplement: Table S2 — Summary of 239 genes that are significantly differentially expressed in both GCA and GNCA. (XLS) [file pone.0063826.s002.xls]

## Sheet: S2 Both GCA & GNCA
Table S2: Summary of 239 genes that were significantly differentially expressed in both GCA and GNCA*
Probeset	Probeset	Gene	Gene symbol	Cytoband	P-value	Fold change**	P-value	Fold change**
no.		no.			in GCA	in GCA	in GNCA	in GNCA
UP-REGULATED (113 genes, 151 probes)
1	201012_at	1	ANXA1	9q12-q21.2	1.91e-10	2.21	9.1e-15	2.31
2	204416_x_at	2	APOC1	19q13.2	6.44e-17	2.51	4.98e-15	2.12
3	203382_s_at	3	APOE	19q13.2	5.79e-18	3.78	6.45e-22	3.21
4	203381_s_at		APOE	19q13.2	6.92e-14	2.85	3.13e-21	3.04
5	201954_at	4	ARPC1B/LOC653888	7q22.1	3.42e-22	2.28	1.57e-21	2.02
6	219918_s_at	5	ASPM	1q31	2.93e-16	2.79	1.09e-13	2.32
7	219087_at		ASPN	9q22	7.27e-17	4.12	2.8e-22	5.77
8	201261_x_at	6	BGN	Xq28	9.42e-25	3.46	5.7e-29	3.39
9	213905_x_at	7	BGN/TSHZ1	Xq28/18q22.3	1.38e-22	3.38	5.29e-26	3.26
10	203755_at	8	BUB1B	15q15	6.6e-17	2.56	9.12e-14	2.11
11	202953_at	9	C1QB	1p36.12	2.28e-14	2.58	5.94e-12	2.32
12	218309_at	10	CAMK2N1	1p36.12	4.4e-12	2.35	7.9e-15	2.54
13	201743_at	11	CD14	5q22-q32	4.7e-13	2.02	6.82e-16	2.22
14	201005_at	12	CD9	12p13.3	3.26e-11	2.23	8.65e-16	2.56
15	203213_at	13	CDC2	10q21.1	8.23e-16	2.65	2.18e-11	2.09
16	207173_x_at	14	CDH11	16q22.1	7.29e-21	3.96	1.01e-24	4.07
17	203757_s_at	15	CEACAM6	19q13.2	2.55e-15	6.63	9.62e-09	3.49
18	211657_at		CEACAM6	19q13.2	7.12e-15	5.31	6.86e-08	2.72
19	218542_at	16	CEP55	10q23.33	1.84e-14	2.37	2.53e-11	2.02
20	209396_s_at	17	CHI3L1	1q32.1	1.22e-14	2.5	4.29e-09	2.18
21	209395_at		CHI3L1	1q32.1	8.28e-14	2.38	7.97e-10	2.31
22	204170_s_at	18	CKS2	9q22	9.01e-18	4.13	2.93e-16	2.88
23	203953_s_at	19	CLDN3	7q11.23	1.43e-21	7.86	2.03e-14	5.24
24	201428_at	20	CLDN4	7q11.23	2.99e-19	2.98	4.76e-16	2.59
25	202790_at	21	CLDN7	17p13	9.9e-19	3.06	8e-14	2.68
26	204050_s_at	22	CLTA	9p13	8.85e-15	2.11	1.15e-18	2.09
27	205941_s_at	23	COL10A1	6q21-q22	1.49e-15	3.33	1.03e-16	2.67
28	217428_s_at		COL10A1	6q21-q22	1.35e-11	2.24	4.91e-11	2.09
29	37892_at	24	COL11A1	1p21	9.64e-12	3.99	6.35e-13	3.21
30	209082_s_at	25	COL18A1	21q22.3	1.68e-19	2.34	8.49e-23	2.27
31	209081_s_at		COL18A1	21q22.3	5.37e-20	2.11	9.95e-22	2.14
32	202310_s_at	26	COL1A1	17q21.33	5.55e-23	4.88	6.04e-28	5.43
33	202311_s_at		COL1A1	17q21.33	1.18e-20	4.36	2.3e-27	5.94
34	217430_x_at		COL1A1	17q21.33	1.41e-16	2.42	4.1e-21	3.28
35	202404_s_at	27	COL1A2	7q22.1	1.27e-27	7.73	4.03e-32	8.6
36	202403_s_at		COL1A2	7q22.1	7.43e-20	3	4.85e-23	2.98
37	211161_s_at	28	COL3A1	2q31	2.98e-23	3.94	4.98e-24	3.62
38	215076_s_at		COL3A1	2q31	5.67e-22	3.26	1.41e-24	3.18
39	201852_x_at		COL3A1	2q31	2.83e-20	3.03	1.16e-22	3.13
40	211981_at	29	COL4A1	13q34	2.25e-16	2.83	3.3e-26	3.44
41	211980_at		COL4A1	13q34	5.62e-18	2.57	5.29e-26	2.79
42	211966_at	30	COL4A2	13q34	5.1e-09	2.02	6.71e-21	3.03
43	212488_at	31	COL5A1	9q34.2-q34.3	4.42e-17	2.67	9.46e-21	2.97
44	212489_at		COL5A1	9q34.2-q34.3	4.06e-15	2.62	1.66e-21	3.3
45	221730_at	32	COL5A2	2q14-q32	1.82e-23	3.65	3.08e-24	3.89
46	221729_at		COL5A2	2q14-q32	4.9e-24	3.61	1.33e-24	3.5
47	201438_at	33	COL6A3	2q37	1.44e-16	2.95	2.64e-23	3.5
48	201111_at	34	CSE1L	20q13	1e-16	2.06	5.31e-22	2.32
49	221731_x_at	35	CSPG2	5q14.3	1.89e-21	3.35	4.26e-20	2.95
50	204620_s_at		CSPG2	5q14.3	2.83e-20	3.23	5.83e-20	3.13
51	211571_s_at		CSPG2	5q14.3	1.09e-17	2.92	4.92e-19	3.01
52	215646_s_at		CSPG2	5q14.3	1.1e-18	2.89	4.33e-18	3
53	204619_s_at		CSPG2	5q14.3	3.01e-18	2.62	5.41e-21	2.55
54	206224_at	36	CST1	20p11.21	2.06e-13	4.23	7.61e-12	3.55
55	200838_at	37	CTSB	8p22	1.15e-22	2.51	2.05e-28	2.62
56	200839_s_at		CTSB	8p22	5.49e-23	2.28	2.16e-25	2.12
57	213274_s_at		CTSB	8p22	4.07e-20	2.25	1.76e-26	2.38
58	203693_s_at	38	E2F3	6p22	4.26e-25	2.56	1.71e-25	2.12
59	219787_s_at	39	ECT2	3q26.1-q26.2	7.55e-19	3.2	9.68e-17	2.63
60	209955_s_at	40	FAP	2q23	7.72e-19	2.96	3.83e-25	3.16
61	202766_s_at	41	FBN1	15q21.1	5.6e-11	2.28	3.97e-17	2.77
62	204232_at	42	FCER1G	1q23	3.3e-16	2.04	3.19e-17	2.03
63	212464_s_at	43	FN1	2q34	1.13e-15	3.19	8.04e-26	4.19
64	216442_x_at		FN1	2q34	4.82e-16	3.07	2.85e-26	3.94
65	211719_x_at		FN1	2q34	1.52e-15	3.01	9.19e-26	3.99
66	210495_x_at		FN1	2q34	3.8e-16	2.95	2.91e-26	3.77
67	208782_at	44	FSTL1	3q13.33	1.34e-12	2.04	4.4e-17	2.42
68	202269_x_at	45	GBP1	1p22.2	7.49e-10	2.16	3.33e-11	2.1
69	206102_at	46	GINS1	20p11.21	3.48e-17	2.71	1.39e-11	2.01
70	201667_at	47	GJA1	6q21-q23.2	4.35e-09	2.2	9.32e-11	2.49
71	201141_at	48	GPNMB	7p15	1.21e-09	2.09	3.28e-17	2.59
72	203108_at	49	GPRC5A	12p13-p12.3	2.07e-11	2.91	4.45e-09	2.04
73	218469_at	50	GREM1	15q13-q15	2.1e-08	2.49	5.75e-12	3.04
74	218468_s_at		GREM1	15q13-q15	2.57e-07	2.46	7.84e-12	2.99
75	208808_s_at	51	HMGB2	4q31	2.25e-12	2.19	4.96e-15	2.1
76	206858_s_at	51	HOXC6	12q13.3	2.96e-14	2.5	1.13e-17	2.35
77	203820_s_at	52	IGF2BP3	7p11	1.1e-13	2.92	4.36e-14	3.01
78	203819_s_at		IGF2BP3	7p11	9.15e-13	2.78	1.21e-13	2.77
79	201162_at	53	IGFBP7	4q12	1.51e-15	2.38	8.18e-21	2.81
80	203828_s_at	54	IL32	16p13.3	8.8e-17	2.64	1.52e-12	2.01
81	202859_x_at	55	IL8	4q13-q21	2.98e-09	2.75	1.63e-07	2.23
82	210511_s_at	56	INHBA	7p15-p13	1.03e-25	6.43	3.12e-27	4.96
83	205483_s_at	57	ISG15	1p36.33	1.3e-16	2.84	1.47e-12	2.33
84	205422_s_at	58	ITGBL1	13q33	7.75e-15	2.86	1.73e-14	2.74
85	212942_s_at	59	KIAA1199	15q24	5.32e-13	2.16	1.49e-15	2.09
86	201088_at	60	KPNA2/LOC728860	17q23.1-q23.3	1.42e-16	2.58	3.2e-16	2.15
87	211762_s_at		KPNA2/LOC728860	17q23.1-q23.3	7.3e-16	2.51	4.8e-16	2.1
88	209016_s_at	61	KRT7	12q12-q13	1.51e-11	4.42	3.79e-09	2.7
89	201505_at	62	LAMB1	7q22	4.4e-16	2.13	5.69e-19	2.43
90	221558_s_at	63	LEF1	4q23-q25	1.02e-19	2.69	4.93e-16	2.07
91	219181_at	64	LIPG	18q21.1	3.51e-17	2.05	7.41e-18	2.37
92	215446_s_at	65	LOX	5q23.2	1.65e-12	2.01	1.14e-12	2.22
93	202651_at	66	LPGAT1	1p36.13-q42.3	6.62e-20	2.27	2.36e-17	2.23
94	201744_s_at	67	LUM	12q21.3-q22	8.41e-16	2.41	2.65e-16	2.42
95	202145_at	68	LY6E	8q24.3	6.36e-16	2.38	3.22e-20	2.3
96	218559_s_at	69	MAFB	20q11.2-q13.1	1.12e-15	2.09	2.24e-16	2.09
97	209942_x_at	70	MAGEA3	Xq28	1.56e-08	4.18	8.77e-08	2.95
98	214612_x_at	71	MAGEA6	Xq28	4.11e-08	3.86	6.37e-08	3.15
99	209035_at	72	MDK	11p11.2	3.5e-14	2.31	9.13e-16	2.04
100	202016_at	73	MEST	7q32	2.07e-22	3.53	9.53e-23	3.26
101	203417_at	74	MFAP2	1p36.1-p35	1.53e-16	2.11	4.33e-22	2.39
102	204259_at	75	MMP7	11q21-q22	1.44e-10	3.76	2.53e-09	2.57
103	204885_s_at	76	MSLN	16p13.3	1.46e-07	2.67	1.8e-08	2.07
104	204641_at	77	NEK2	1q32.2-q41	1.31e-14	2.62	4.62e-15	2.33
105	204114_at	78	NID2	14q21-q22	2.27e-12	2.06	1.79e-19	2.42
106	202237_at	79	NNMT	11q23.1	4.79e-19	3.04	5.79e-17	2.82
107	202238_s_at		NNMT	11q23.1	2.19e-18	2.71	2.52e-16	2.75
108	200875_s_at	80	NOL5A	20p13	1.04e-18	2.33	1.3e-24	2.41
109	218051_s_at	81	NT5DC2	3p21.1	1.19e-16	2.54	2.02e-19	2.39
110	213125_at	82	OLFML2B	1q23.3	2.86e-20	3.61	1.7e-22	3.55
111	209803_s_at	83	PHLDA2	11p15.5	9.03e-16	2.8	4.87e-08	2.03
112	202446_s_at	84	PLSCR1	3q23	1.07e-15	2.44	2.83e-17	2.22
113	210830_s_at	85	PON2	7q21.3	1.17e-14	2.41	8.11e-13	2.04
114	218009_s_at	86	PRC1	15q26.1	1.94e-18	3.13	3.77e-13	2.17
115	217764_s_at	87	RAB31	18p11.3	4.35e-13	2.66	5.2e-21	3.32
116	217762_s_at		RAB31	18p11.3	2.11e-12	2.43	2.57e-20	3.1
117	217763_s_at		RAB31	18p11.3	1.64e-11	2.35	6.26e-21	2.98
118	221872_at	88	RARRES1	3q25.32-q25.33	2.49e-17	4.19	3.32e-20	4.26
119	206392_s_at		RARRES1	3q25.32-q25.33	4.57e-14	3.11	7.24e-17	2.98
120	200872_at	89	S100A10	1q21	1.53e-20	2.95	1e-16	2.46
121	204855_at	90	SERPINB5	18q21.3	1.61e-12	3.09	8.75e-09	2.8
122	212190_at	91	SERPINE2	2q33-q35	1.27e-15	2.62	3.02e-16	2.6
123	200986_at	92	SERPING1	11q12-q13.1	2.11e-09	2.05	9.89e-12	2.22
124	207714_s_at	93	SERPINH1	11q13.5	1.16e-21	2.29	9.7e-26	2.57
125	204051_s_at	94	SFRP4	7p14.1	1.13e-21	4.82	1.63e-21	4.66
126	204052_s_at		SFRP4	7p14.1	4.68e-14	2.19	8.85e-13	2.13
127	202690_s_at	95	SNRPD1	18q11.2	7.11e-16	2.28	1.92e-19	2.21
128	215223_s_at	96	SOD2	6q25.3	1.3e-12	2.11	5.51e-14	2.23
129	200665_s_at	97	SPARC	5q31.3-q32	5.92e-23	3.57	1.73e-29	3.81
130	212667_at		SPARC	5q31.3-q32	1.19e-15	2.41	9.91e-22	2.84
131	209875_s_at	98	SPP1	4q21-q25	5.36e-19	6.21	7.55e-22	6.25
132	205542_at	99	STEAP1	7q21	4.71e-18	2.37	2.28e-13	2.13
133	212353_at	100	SULF1	8q13.2-q13.3	2.88e-28	6.02	3.56e-29	6.5
134	212354_at		SULF1	8q13.2-q13.3	2.95e-28	5.95	1.14e-31	6.74
135	212344_at		SULF1	8q13.2-q13.3	6.61e-22	2.94	3.2e-25	3.18
136	201506_at	101	TGFBI	5q31	3.44e-12	2.15	5e-18	2.56
137	201110_s_at	102	THBS1	15q15	1.56e-09	2.32	3.21e-15	2.85
138	203083_at	103	THBS2	6q27	1.79e-21	4.49	6.12e-27	4.47
139	204776_at	104	THBS4	5q13	5.31e-09	2.24	2.43e-15	3.25
140	208850_s_at	105	THY1	11q22.3-q23	2.52e-22	2.94	5.24e-29	3.84
141	213869_x_at		THY1	11q22.3-q23	6.88e-21	2.62	7.94e-27	2.71
142	208851_s_at		THY1	11q22.3-q23	1.22e-20	2.46	6.45e-25	2.67
143	201666_at	106	TIMP1	Xp11.3-p11.23	1.18e-26	4.48	6.51e-29	4.18
144	215034_s_at	107	TM4SF1	3q21-q25	3.99e-12	2.71	1.18e-11	2.33
145	217875_s_at	108	TMEPAI	20q13.31-q13.33	7.12e-16	2.46	8.26e-17	2.46
146	201291_s_at	109	TOP2A	17q21-q22	9.08e-15	2.99	9.45e-13	2.59
147	201292_at		TOP2A	17q21-q22	2.64e-15	2.99	5.12e-12	2.33
148	204122_at	110	TYROBP	19q13.1	1.38e-18	2.97	3.73e-20	2.84
149	202779_s_at	111	UBE2S/LOC731049	19q13.43	3.37e-12	2.32	6.52e-17	2.07
150	203868_s_at	112	VCAM1	1p32-p31	4.28e-19	2.33	3.23e-14	2.18
151	200808_s_at	113	ZYX	7q32	1.99e-10	2.18	1.84e-25	3.09
DOWN-REGULATED (126 genes, 160 probes)
1	205969_at	1	AADAC	3q21.3-q25.2	7.87e-12	0.49	3.63e-17	0.335
2	205942_s_at	2	ACSM3	16p13.11	6.45e-17	0.468	3.3e-18	0.444
3	210377_at		ACSM3	16p13.11	4.28e-17	0.357	3.56e-20	0.338
4	216705_s_at	3	ADA	20q12-q13.11	1.55e-17	0.484	7.91e-21	0.43
5	204639_at		ADA	20q12-q13.11	5.61e-19	0.436	1.25e-23	0.391
6	208268_at	4	ADAM28	8p21.2	9.46e-12	0.457	8.09e-22	0.319
7	205997_at		ADAM28	8p21.2	6.43e-12	0.403	6.87e-22	0.285
8	206262_at	5	ADH1A/ADH1B/ADH1C	4q21-q23	3.87e-11	0.379	4.59e-17	0.265
9	209612_s_at	6	ADH1B	4q21-q23	6.23e-14	0.252	3.22e-09	0.404
10	221008_s_at	7	AGXT2L1	4q25	1.15e-15	0.422	2.69e-20	0.441
11	206561_s_at	8	AKR1B10	7q33	4.04e-12	0.131	1.81e-21	0.0712
12	216594_x_at	9	AKR1C1	10p15-p14	6.58e-12	0.484	1.79e-15	0.431
13	204151_x_at		AKR1C1	10p15-p14	7.04e-13	0.414	2.77e-17	0.367
14	211653_x_at	10	AKR1C2	10p15-p14	2.45e-11	0.458	4.48e-15	0.396
15	209699_x_at		AKR1C2	10p15-p14	2.29e-12	0.439	2.4e-18	0.363
16	206469_x_at	11	AKR7A3	1p35.1-p36.23	1.32e-17	0.317	4.41e-35	0.26
17	216381_x_at		AKR7A3	1p35.1-p36.23	1.19e-17	0.275	5.11e-34	0.235
18	212224_at	12	ALDH1A1	9q21.13	5.44e-12	0.303	1.4e-18	0.206
19	205623_at	13	ALDH3A1	17p11.2	2.67e-14	0.294	5.5e-25	0.183
20	204290_s_at	14	ALDH6A1	14q24.3	3.51e-25	0.365	1.63e-29	0.404
21	221588_x_at		ALDH6A1	14q24.3	3.08e-26	0.345	1.91e-29	0.37
22	221589_s_at		ALDH6A1	14q24.3	6.64e-27	0.291	1.31e-27	0.321
23	210143_at	15	ANXA10	4q33	2.32e-17	0.0986	4.91e-20	0.0962
24	209462_at	16	APLP1	19q13.1	4.54e-19	0.386	3.68e-20	0.393
25	207139_at	17	ATP4A	19q13.1	1.14e-26	0.0308	1.22e-36	0.024
26	207546_at	18	ATP4B	13q34	4.17e-28	0.0171	1.33e-37	0.0135
27	209309_at	19	AZGP1	7q22.1	4.88e-12	0.193	9.67e-23	0.145
28	217014_s_at	20	AZGP1/LOC646282	7q22.1	3.04e-13	0.335	7.24e-23	0.284
29	204073_s_at	21	C11orf9	11q12-q13.1	8.92e-10	0.468	1.07e-21	0.318
30	205500_at	22	C5	9q33-q34	1.72e-15	0.477	1.12e-18	0.492
31	209301_at	23	CA2	8q22	3.64e-13	0.172	1.82e-17	0.119
32	205199_at	24	CA9	9p13-p12	9.7e-19	0.237	5.27e-32	0.18
33	210641_at	25	CAPN9	1q42.11-q42.3	7.34e-15	0.4	1.65e-28	0.273
34	208063_s_at		CAPN9	1q42.11-q42.3	2.52e-16	0.347	5.39e-28	0.241
35	211173_at	26	CCKAR	4p15.1-p15.2	2.83e-19	0.464	3.56e-22	0.425
36	210381_s_at	27	CCKBR	11p15.4	3.18e-24	0.282	4.18e-29	0.31
37	205382_s_at	28	CFD	19p13.3	4.25e-13	0.309	1.12e-07	0.473
38	204697_s_at	29	CHGA	14q32	9.41e-23	0.338	1.23e-24	0.31
39	220630_s_at	30	CHIA	1p13.1-p21.3	1.92e-22	0.0435	5.16e-22	0.0894
40	200884_at	31	CKB	14q32	3.58e-21	0.249	2.39e-17	0.333
41	204810_s_at	32	CKM	19q13.2-q13.3	1.18e-14	0.411	1.65e-17	0.442
42	205295_at	33	CKMT2	5q13.3	1.55e-20	0.487	6.93e-23	0.495
43	221132_at	34	CLDN18	3q22.3	7.49e-12	0.284	1.01e-16	0.186
44	221133_s_at		CLDN18	3q22.3	5.69e-11	0.28	1.16e-15	0.189
45	214135_at		CLDN18	3q22.3	7.53e-09	0.25	1.11e-13	0.205
46	205200_at	35	CLEC3B	3p22-p21.3	9.74e-13	0.392	2.44e-10	0.496
47	213492_at	36	COL2A1	12q13.11-q13.2	9.54e-17	0.265	1.08e-17	0.302
48	206212_at	37	CPA2	7q32	1.84e-24	0.155	1.34e-32	0.146
49	205927_s_at	38	CTSE	1q31	8.86e-08	0.307	5.93e-14	0.227
50	208126_s_at	39	CYP2C18	10q24	1.21e-10	0.409	1.3e-18	0.281
51	208281_x_at	40	DAZ1/DAZ3/DAZ2/DAZ4	Yq11.223	1.41e-07	0.488	3.59e-11	0.35
52	207909_x_at		DAZ1/DAZ3/DAZ2/DAZ4	Yq11.223	1.34e-08	0.444	2.24e-12	0.3
53	208282_x_at		DAZ1/DAZ3/DAZ2/DAZ4	Yq11.223	1.14e-08	0.409	1.64e-12	0.277
54	207912_s_at		DAZ1/DAZ3/DAZ2/DAZ4	Yq11.223	1.1e-09	0.314	2.51e-13	0.218
55	208072_s_at	41	DGKD	2q37.1	3.07e-21	0.414	1.96e-30	0.378
56	215800_at	42	DUOX1	15q15.3	1.76e-13	0.491	2.28e-22	0.423
57	219597_s_at		DUOX1	15q15.3	2.79e-15	0.295	1.74e-24	0.245
58	219727_at	43	DUOX2	15q15.3	2.43e-08	0.413	4.29e-15	0.277
59	220161_s_at	44	EPB41L4B	9q31-q32	7.78e-13	0.433	5.76e-23	0.346
60	220012_at	45	ERO1LB	1q42.2-q43	3.13e-15	0.468	6.59e-19	0.428
61	209966_x_at	46	ESRRG	1q41	1.95e-19	0.236	4.89e-31	0.126
62	207981_s_at		ESRRG	1q41	1.3e-26	0.0762	2.24e-34	0.0562
63	219429_at	47	FA2H	16q23	9.43e-09	0.453	1.21e-17	0.347
64	206844_at	48	FBP2	9q22.3	1.02e-22	0.452	1.82e-28	0.439
65	215300_s_at	49	FMO5	1q21.1	3.78e-12	0.472	1.48e-28	0.337
66	205776_at	50	FMO5	1q21.1	6.89e-12	0.457	3.64e-26	0.32
67	204437_s_at	51	FOLR1	11q13.3-q14.1	1.54e-10	0.466	6.85e-22	0.36
68	213280_at	52	GARNL4	17p13.3	1.36e-16	0.496	8.97e-21	0.458
69	53	53	GIF	11q13	3.5e-27	0.023	1.58e-37	0.0183
70	220191_at	54	GKN1	2p14	8.26e-24	0.0211	6.5e-31	0.0181
71	215001_s_at	55	GLUL	1q31	2.83e-18	0.451	3.58e-20	0.498
72	200648_s_at		GLUL	1q31	9e-16	0.418	7.23e-20	0.386
73	210640_s_at	56	GPR30	7p22.3	9.57e-25	0.268	7.21e-23	0.361
74	206002_at	57	GPR64	Xp22.13	5.49e-17	0.492	5.81e-23	0.406
75	219327_s_at	58	GPRC5C	17q25	1.15e-16	0.416	2.94e-26	0.355
76	203924_at	59	GSTA1	6p12.1	4.34e-15	0.346	2.82e-18	0.282
77	211745_x_at	60	HBA1	16p13.3	7e-14	0.345	8.9e-12	0.455
78	217414_x_at	61	HBA1/HBA2	16p13.3	5.03e-14	0.353	2.18e-12	0.46
79	204018_x_at		HBA1/HBA2	16p13.3	8.88e-15	0.349	4.87e-12	0.469
80	209458_x_at		HBA1/HBA2	16p13.3	4.27e-14	0.348	3.23e-11	0.463
81	211699_x_at		HBA1/HBA2	16p13.3	7.67e-15	0.338	1.42e-12	0.454
82	214414_x_at	62	HBA2	16p13.3	5.82e-15	0.36	6.08e-12	0.431
83	217232_x_at	63	HBB	11p15.5	4.37e-15	0.359	3.74e-11	0.491
84	211696_x_at		HBB	11p15.5	6.65e-15	0.348	3.75e-12	0.47
85	209116_x_at		HBB	11p15.5	1.73e-14	0.302	2.49e-11	0.412
86	207067_s_at	64	HDC	15q21-q22	2.66e-19	0.486	5.51e-20	0.486
87	217080_s_at	65	HOMER2	15q24.3	2.42e-16	0.432	4.84e-24	0.4
88	203913_s_at	66	HPGD	4q34-q35	8.34e-16	0.301	2.89e-23	0.228
89	203914_x_at		HPGD	4q34-q35	4.4e-17	0.287	1.23e-23	0.265
90	211548_s_at		HPGD	4q34-q35	3.18e-15	0.278	4.41e-22	0.251
91	202718_at	67	IGFBP2	2q33-q34	3.51e-15	0.331	1.91e-17	0.354
92	215118_s_at	68	IGHA1	14q32.33	3.94e-11	0.303	1.1e-17	0.225
93	212592_at	69	IGJ	4q21	1.5e-07	0.347	1.32e-15	0.229
94	221095_s_at	70	KCNE2	21q22.12	1.01e-26	0.101	2e-33	0.0926
95	210119_at	71	KCNJ15	21q22.2	7.27e-17	0.372	4.85e-24	0.285
96	219564_at	72	KCNJ16	17q23.1-q24.2	3.85e-19	0.197	1.23e-27	0.108
97	221868_at	73	KIAA1155	2p13.3	3.01e-21	0.466	2.72e-25	0.444
98	221874_at	74	KIAA1324	1p13.3	1.23e-11	0.411	6.52e-23	0.321
99	220266_s_at	75	KLF4	9q31	2.32e-15	0.433	9.29e-13	0.476
100	221841_s_at		KLF4	9q31	4.02e-17	0.37	2.09e-15	0.396
101	205470_s_at	76	KLK11	19q13.3-q13.4	2.05e-12	0.306	2.31e-25	0.269
102	211354_s_at	77	LEPR	1p31	1.93e-13	0.407	4.83e-17	0.447
103	211355_x_at		LEPR	1p31	3.48e-13	0.399	6.07e-17	0.422
104	211356_x_at		LEPR	1p31	2.87e-13	0.365	4.6e-18	0.41
105	209894_at		LEPR	1p31	1.04e-12	0.306	6.99e-10	0.413
106	206334_at	78	LIPF	10q23.31	5.62e-23	0.0242	3.71e-25	0.0359
107	211456_x_at	79	LOC645745	1q43	4.29e-25	0.277	2.86e-21	0.39
108	202018_s_at	80	LTF/LOC728320	3q21-q23	7.77e-11	0.201	1.45e-18	0.126
109	212741_at	81	MAOA	Xp11.3	7.4e-16	0.411	3.95e-16	0.48
110	207761_s_at	82	METTL7A	12q13.13	8.42e-24	0.271	2.77e-21	0.329
111	212859_x_at	83	MT1E	16q13	8.15e-25	0.232	1.37e-22	0.327
112	213629_x_at	84	MT1F	16q13	8.38e-23	0.178	7.46e-25	0.244
113	217165_x_at		MT1F	16q13	1.88e-25	0.171	1.59e-23	0.263
114	210472_at	85	MT1G	16q13	9.22e-18	0.4	4.55e-16	0.393
115	204745_x_at		MT1G	16q13	8.73e-26	0.153	2.58e-23	0.244
116	206461_x_at	86	MT1H	16q13	1.14e-25	0.217	6.42e-22	0.328
117	216336_x_at	87	MT1M	16q13	1.26e-24	0.257	8.44e-22	0.37
118	217546_at		MT1M	16q13	1.24e-28	0.0761	2.42e-24	0.148
119	204326_x_at	88	MT1X	16q13	9.65e-27	0.202	6.09e-19	0.326
120	208581_x_at		MT1X	16q13	1.4e-26	0.195	1.28e-19	0.32
121	212185_x_at	89	MT2A	16q13	5.01e-25	0.296	3.9e-18	0.424
122	217187_at	90	MUC5AC	11p15.5	8.49e-13	0.426	6.63e-26	0.25
123	214385_s_at	91	MUC5AC/LOC730855	11p15.5	1.2e-15	0.11	8.03e-23	0.0738
124	214133_at	92	MUC6	11p15.5-p15.4	1.39e-19	0.271	1.4e-19	0.224
125	210155_at	93	MYOC	1q23-q24	1.72e-11	0.42	7.88e-18	0.437
126	212843_at	94	NCAM1	11q23.1	8.24e-18	0.291	1.06e-15	0.476
127	212448_at	95	NEDD4L	18q21	4.06e-23	0.45	1.5e-20	0.492
128	205041_s_at	96	ORM1/ORM2	9q31-q32/chr9q32	1.52e-10	0.463	2.39e-08	0.487
129	206637_at	97	P2RY14	3q21-q25	2.22e-09	0.381	1.4e-15	0.482
130	219543_at	98	PBLD	10pter-q25.3	4.25e-12	0.332	1.54e-21	0.254
131	219304_s_at	99	PDGFD	11q22.3	2.88e-15	0.447	3.77e-15	0.44
132	206691_s_at	100	PDIA2	16p13.3	3.91e-17	0.255	8.51e-24	0.235
133	218025_s_at	101	PECI	6p24.3	1.26e-18	0.383	5.01e-23	0.432
134	213265_at	102	PGA5/PGA3/PGA4	11q13/chr11q12.2	7.31e-25	0.0315	4.25e-27	0.0546
135	205261_at	103	PGC	6p21.3-p21.1	2.86e-19	0.0618	4.86e-22	0.0651
136	215129_at	104	PIK3C2G	12p12	3.6e-21	0.361	4.66e-27	0.32
137	205267_at	105	POU2AF1	11q23.1	2.02e-07	0.346	6.48e-14	0.279
138	205319_at	106	PSCA	8q24.2	1.55e-19	0.12	7.17e-28	0.0772
139	213933_at	107	PTGER3	1p31.2	8.62e-17	0.367	7.49e-14	0.423
140	204469_at	108	PTPRZ1	7q31.3	1.19e-16	0.471	1.13e-23	0.356
141	219076_s_at	109	PXMP2	12q24.33	3.52e-20	0.427	1.97e-25	0.44
142	203911_at	110	RAP1GAP	1p36.1-p35	1.05e-11	0.446	2.52e-19	0.354
143	209752_at	111	REG1A	2p12	1.66e-10	0.15	1.3e-15	0.121
144	205815_at	112	REG3A	2p12	1.68e-07	0.255	1.65e-14	0.145
145	201785_at	113	RNASE1	14q11.2	2.34e-13	0.419	3.49e-18	0.369
146	207057_at	114	SLC16A7	12q13	4.2e-14	0.445	2.2e-22	0.356
147	207249_s_at	115	SLC28A2	15q15	3.43e-10	0.421	1.61e-09	0.424
148	213456_at	116	SOSTDC1	7p21.1	3.28e-21	0.342	4.27e-28	0.198
149	213921_at	117	SST	3q28	4.75e-18	0.163	2.42e-31	0.132
150	211470_s_at	118	SULT1C1	2q11.1-q11.2	3.29e-10	0.216	2.41e-16	0.161
151	205342_s_at		SULT1C1	2q11.1-q11.2	3.6e-11	0.216	1.13e-17	0.158
152	205343_at		SULT1C1	2q11.1-q11.2	2.55e-15	0.216	2.85e-23	0.172
153	205513_at	119	TCN1	11q11-q12	4.18e-07	0.322	2.98e-13	0.215
154	205009_at	120	TFF1	21q22.3	8.63e-10	0.171	3.72e-18	0.0794
155	214476_at	121	TFF2	21q22.3	3.29e-14	0.131	4e-21	0.084
156	211689_s_at	122	TMPRSS2	21q22.3	3.28e-13	0.297	2.94e-21	0.213
157	216687_x_at	123	UGT2B15	4q13	5.09e-12	0.448	5.54e-19	0.469
158	207392_x_at	124	UGT2B15/UGT2B17/LOC728160	4q13/chr4q13.2	6.86e-16	0.266	6.89e-20	0.317
159	206698_at	125	XK	Xp21.1	1.22e-16	0.355	2.87e-16	0.398
160	219401_at	126	XYLT2	17q21.3-17q22	1.07e-21	0.45	3.95e-27	0.404
*Ordered alphabetically within up- and down-regulated categories
**Fold change = ratio of tumor to normal RNA expression
